# Supplementary material for: Integrating Morphological and Physiological Responses of Tomato Plants to Light Quality to the Crop Level by 3D Modeling
Source: PubMed Central journal article supplement (PMC6637845; doi:10.3389/fpls.2019.00839), 2019-07-11
Supplement: Data_Sheet_1.pdf [file Data_Sheet_1.pdf]

## *Supplementary Material*

# **Integrating Morphological and Physiological Responses of Tomato Plants to Light Quality to the Crop Level by 3D Modelling**

**J.A. Dieleman\*, P.H.B. De Visser, E. Meinen, J.G. Grit, T.A. Dueck**

\* **Correspondence:** J.Anja Dieleman, [anja.dieleman@wur.nl](mailto:anja.dieleman@wur.nl)

## **2 Supplementary Figures**

**FIGURE S1** | Spectral distribution of the light treatments.

**FIGURE S2** | Measured leaf and leaflet angles: LIA= leaf insertion angle; RA= rachis; TLA=top leaflet angle; base= base leaflet angle; middle= middle leaflet angle; outside= outside leaflet angle.
