# Supplementary material for: Integrating Morphological and Physiological Responses of Tomato Plants to Light Quality to the Crop Level by 3D Modeling
Source: PubMed Central journal article supplement (PMC6637845; doi:10.3389/fpls.2019.00839), 2019-07-11
Supplement: Table_1.pdf [file Table_1.pdf]

## *Supplementary Material*

# **Integrating Morphological and Physiological Responses of Tomato Plants to Light Quality to the Crop Level by 3D Modelling**

**J.A. Dieleman\*, P.H.B. De Visser, E. Meinen, J.G. Grit, T.A. Dueck**

\* **Correspondence:** J.Anja Dieleman, [anja.dieleman@wur.nl](mailto:anja.dieleman@wur.nl)

**Table S1** | Greenhouse climate.

|              | <b>Air temperature<br/>(°C)</b> | <b>CO<sub>2</sub> concentration<br/>(ppm)</b> | <b>Vapour deficit<br/>(g m<sup>-2</sup>)</b> |
|--------------|---------------------------------|-----------------------------------------------|----------------------------------------------|
| Experiment 1 |                                 |                                               |                                              |
| Greenhouse 1 | 20.3                            | 509                                           | 5.12                                         |
| Greenhouse 2 | 20.4                            | 506                                           | 5.06                                         |
| Experiment 2 |                                 |                                               |                                              |
| Greenhouse 1 | 20.1                            | 539                                           | 5.49                                         |
| Greenhouse 2 | 20.9                            | 524                                           | 6.19                                         |

*Realized air temperatures, CO<sub>2</sub> concentrations and vapor deficits in the 2 greenhouse compartments in the 2 experiments. Data are the means of 5 min recordings during the experiments (n=6048).*
