# Supplementary material for: Integrating Morphological and Physiological Responses of Tomato Plants to Light Quality to the Crop Level by 3D Modeling
Source: PubMed Central journal article supplement (PMC6637845; doi:10.3389/fpls.2019.00839), 2019-07-11
Supplement: Table_2.pdf [file Table_2.pdf]

## *Supplementary Material*

# **Integrating Morphological and Physiological Responses of Tomato Plants to Light Quality to the Crop Level by 3D Modelling**

J.A. Dieleman\*, P.H.B. De Visser, E. Meinen, J.G. Grit, T.A. Dueck

\* Correspondence: J.Anja Dieleman, [anja.dieleman@wur.nl](mailto:anja.dieleman@wur.nl)

**TABLE S2** | Effects of spectral composition on air and leaf temperatures.

| <b>Treatment</b> | <b>Air temperature<br/>(°C)</b> | <b>Leaf temperature<br/>(°C)</b> | <b>Temperature difference<br/>(°C)</b> |
|------------------|---------------------------------|----------------------------------|----------------------------------------|
| Blue             | 22.1 ± 0.1                      | 19.6 ± 0.2                       | 2.5 ± 0.3                              |
| Green            | 23.4 ± 0.1                      | 20.9 ± 0.2                       | 2.6 ± 0.2                              |
| Amber            | 22.4 ± 0.1                      | 19.9 ± 0.2                       | 2.5 ± 0.2                              |
| Red              | 21.7 ± 0.1                      | 19.5 ± 0.2                       | 2.2 ± 0.2                              |
| Red/blue         | 21.6 ± 0.1                      | 19.4 ± 0.2                       | 2.1 ± 0.2                              |
| White            | 22.0 ± 0.1                      | 19.6 ± 0.1                       | 2.3 ± 0.2                              |

*Realized air temperatures, leaf temperature and the difference between leaf and air temperatures in each of the spectral light treatments measured on 4 days in divided over experiments 1 and 2 (n=22).*
